# Supplementary material for: Prevalence of Overweight, Obesity, Abdominal Obesity, and Obesity-Related Risk Factors in Polish Preschool Children: A Cross-Sectional Study
Source: MDPI journal article supplement (doi:10.3390/jcm10040790), 2021-02-16
Supplement: s1 [file s1]

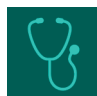

# EXCESS BODY WEIGHT among Polish preschoolers

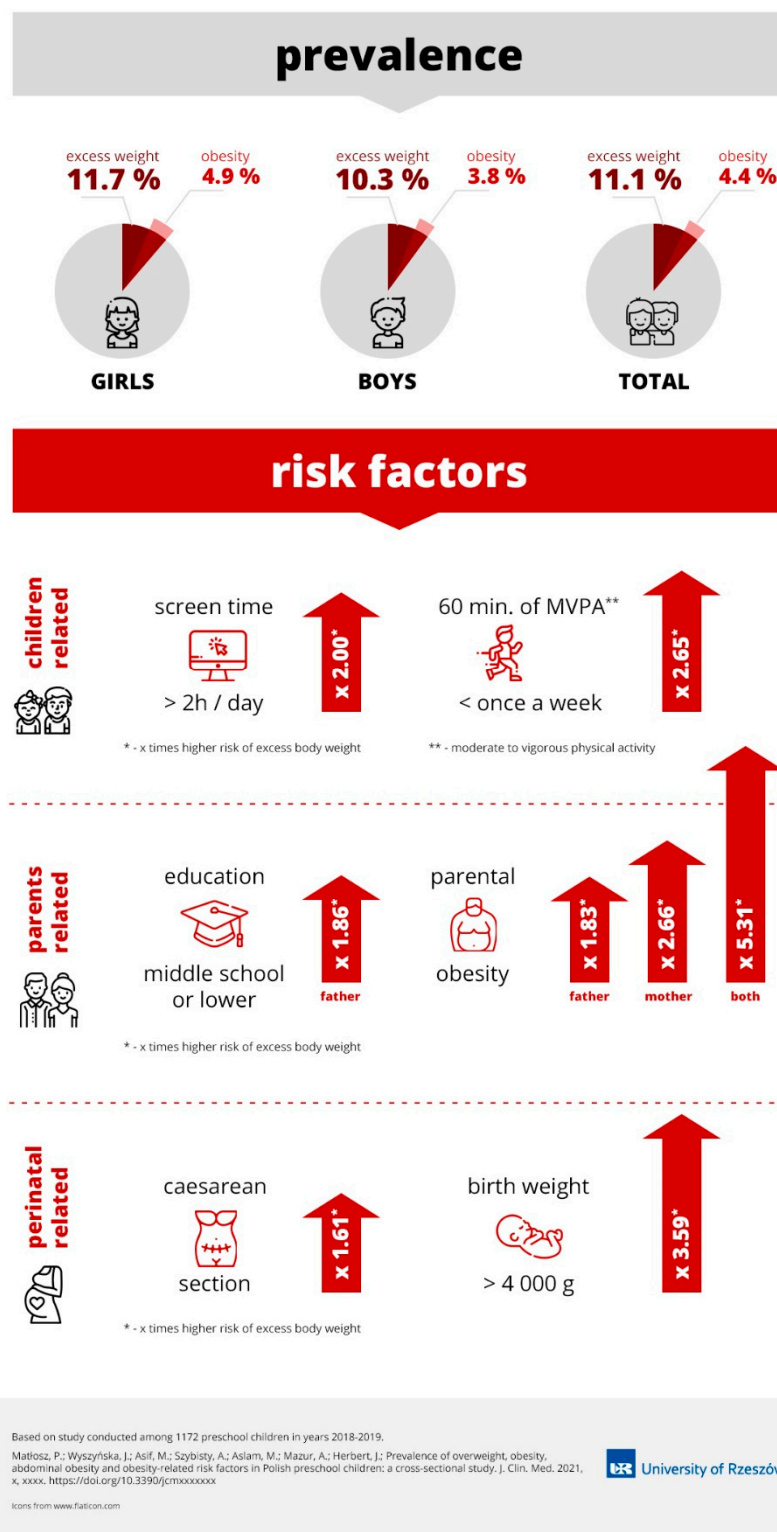

Figure S1. The prevalence and risk factors of excess body weight among Polish preschoolers.

# EXCESS BODY ADIPOSITY among Polish preschoolers

## prevalence

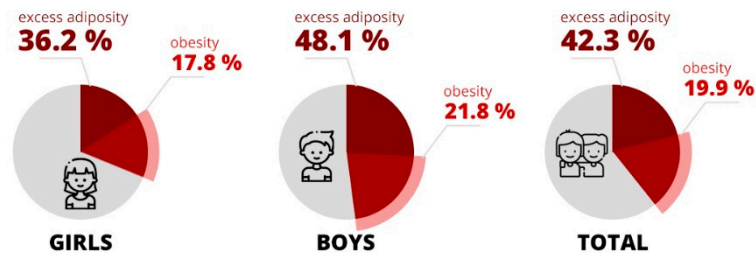

## risk factors

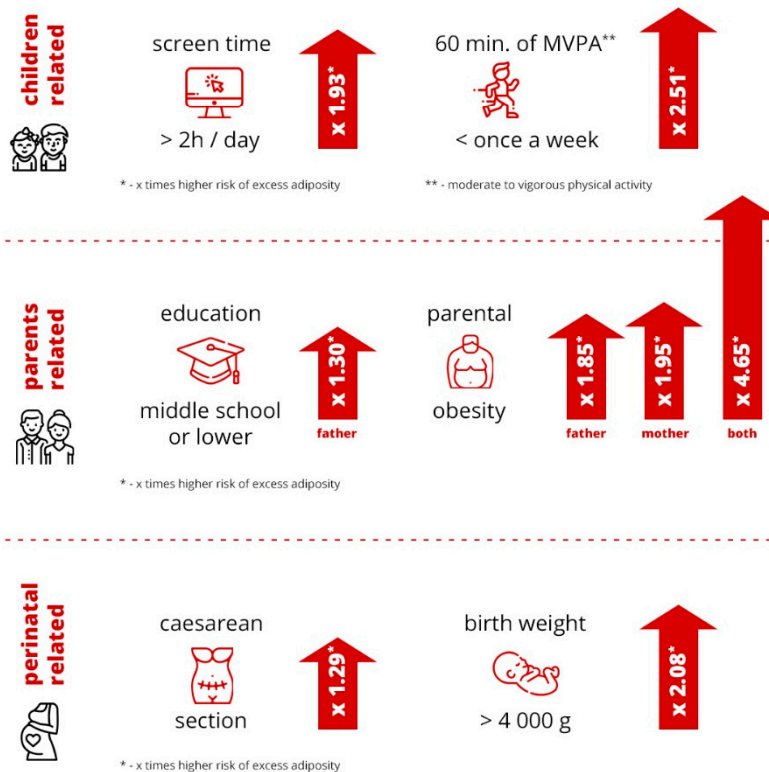

Based on study conducted among 1172 preschool children in years 2018-2019.

Mattoz, P.; Wyszynska, J.; Asif, M.; Szybisty, A.; Aslam, M.; Mazur, A.; Herbert, J.; Prevalence of overweight, obesity, abdominal obesity and obesity-related risk factors in Polish preschool children: a cross-sectional study. J. Clin. Med. 2021, x, xxxx. <https://doi.org/10.3390/jcmxxxxxx>

Icons from [www.flaticon.com](http://www.flaticon.com)

University of Rzeszów

Figure S2. The prevalence and risk factors of excess body adiposity among Polish preschoolers.

# ABDOMINAL OBESITY among Polish preschoolers

## prevalence

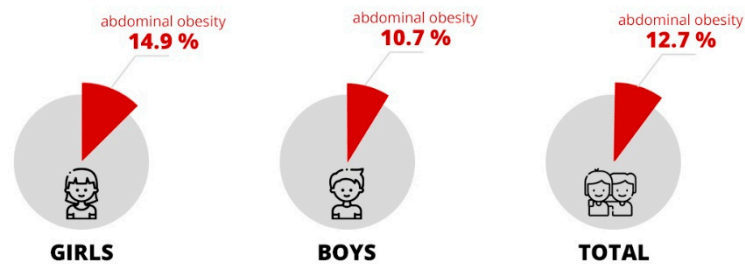

## risk factors

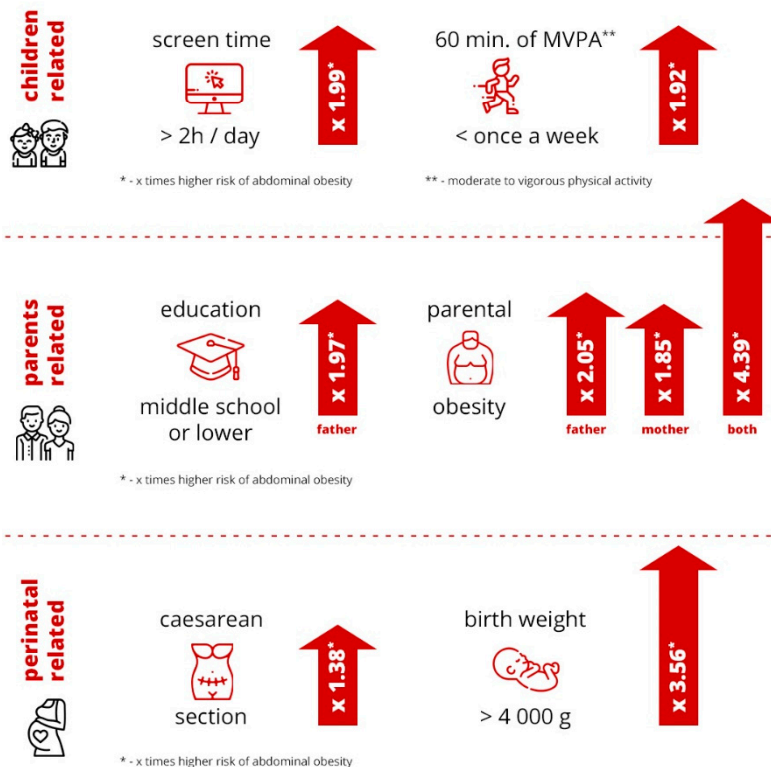

Based on study conducted among 1172 preschool children in years 2018-2019.

Matyasz, P.; Wyszynska, J.; Asif, M.; Szybisty, A.; Aslam, M.; Mazur, A.; Herbert, J.; Prevalence of overweight, obesity, abdominal obesity and obesity-related risk factors in Polish preschool children: a cross-sectional study. J. Clin. Med. 2021, x, xxxx. <https://doi.org/10.3390/jcmxxxxxx>

Icons from www.flaticon.com

University of Rzeszów

Figure S3. The prevalence and risk factors of abdominal adiposity among Polish preschoolers.
